# Supplementary material
Source: Springer Nature journal article supplement (https://www.springermedizin.de/resource/supplementary/12936_2007_460_MOESM4_ESM.pdf/9547498)

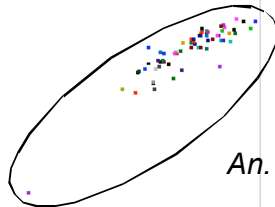

*An. gambiae* s.s. /*An. arabiensis*

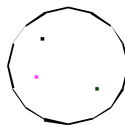

Failed  
reactions

*An. quadriannulatus*/*An.*  
*merus*/*An. melas*

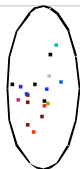

Supplement: MOESM4 [file 9547498]
